# Supplementary material for: Blueberry, combined with probiotics, alleviates non-alcoholic fatty liver diseaseviaIL-22-mediated JAK1/STAT3/BAX signaling
Source: Royal Society of Chemistry journal article supplement (doi:10.1039/c8fo01227j), 2018-01-01
Supplement: c8fo01227j2.pdf [file c8fo01227j2.pdf]

## **Supporting information**

**Table S1** Survival rate of probiotics in the blueberry juice.

**Table S2** NASH scoring system.

**Table S3** Primers for qRT-PCR.

**Table S4** Area of adipose cells in liver tissue of each group.

**Fig S1** Western blot of IL-22, JAK1, STAT3, and BAX.
