# Supplementary material for: Blueberry, combined with probiotics, alleviates non-alcoholic fatty liver diseaseviaIL-22-mediated JAK1/STAT3/BAX signaling
Source: Royal Society of Chemistry journal article supplement (doi:10.1039/c8fo01227j), 2018-01-01
Supplement: c8fo01227j3.pdf [file c8fo01227j3.pdf]

Table S1 Survival rate of probiotics in the blueberry juice.

| Time post- mixture<br>of probiotics and<br>blueberry juice | N0(CFU/ml)        | N1(CFU/ml)          | probiotic survival<br>rate (%) |
|------------------------------------------------------------|-------------------|---------------------|--------------------------------|
| 6h                                                         | 5X10 <sup>6</sup> | 5.9X10 <sup>7</sup> | 115.2%                         |
| 12h                                                        | 5X10 <sup>6</sup> | 6.3X10 <sup>7</sup> | 116.4%                         |
| 24h                                                        | 5X10 <sup>6</sup> | 5.2X10 <sup>8</sup> | 130.1%                         |

Probiotics survival rate (%) =  $\lg N1 / \lg N0 \times 100\%$ . N1: number of live bacteria (CFU/ml) after treatment; N0: initial quantity of live bacteria (CFU/ml).
