# Supplementary material for: Blueberry, combined with probiotics, alleviates non-alcoholic fatty liver diseaseviaIL-22-mediated JAK1/STAT3/BAX signaling
Source: Royal Society of Chemistry journal article supplement (doi:10.1039/c8fo01227j), 2018-01-01
Supplement: c8fo01227j6.pdf [file c8fo01227j6.pdf]

---

**Table S4** The area of adipose cells in liver tissue of each group.

---

| Groups    | n | Area                    |
|-----------|---|-------------------------|
| Normal    | 8 | 6.32±0.42 <sup>d</sup>  |
| NC        | 8 | 18.26±0.95 <sup>b</sup> |
| NC-BP     | 8 | 10.52±0.63 <sup>c</sup> |
| IL22si    | 8 | 22.41±0.83 <sup>a</sup> |
| IL22si-BP | 8 | 16.42±0.43 <sup>b</sup> |

---

Different lowercase letters represent significant differences ( $P < 0.05$ , one way anova).
