# Supplementary figures and images for: Blueberry, combined with probiotics, alleviates non-alcoholic fatty liver diseaseviaIL-22-mediated JAK1/STAT3/BAX signaling
Source: Royal Society of Chemistry journal article supplement (doi:10.1039/c8fo01227j), 2018-01-01

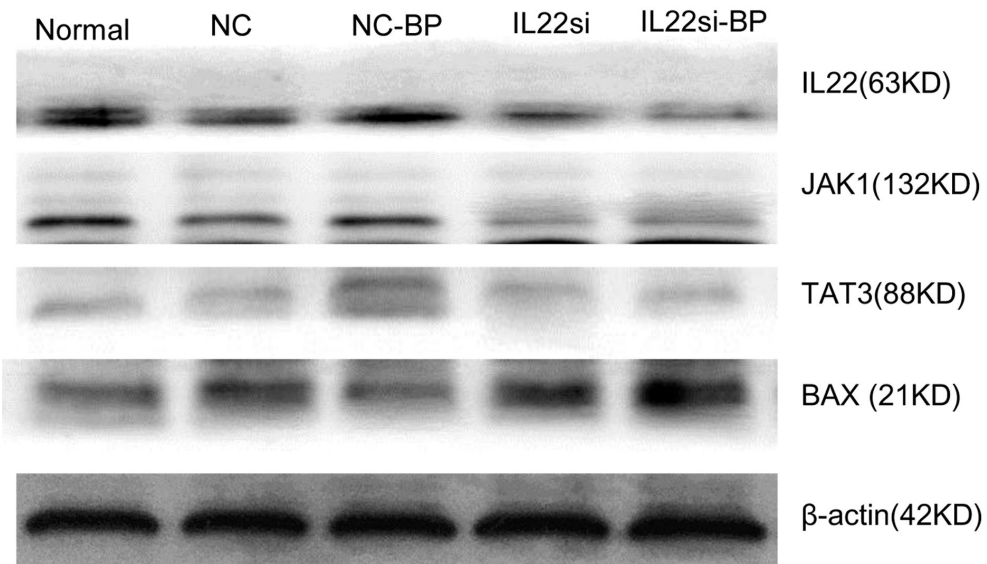

Supplement: c8fo01227j1.pdf [file c8fo01227j1.pdf]
